# Supplementary material for: Artificial Synapse with Tunable Dynamic Range for Neuromorphic Computing with Ion Intercalated Bilayer Graphene
Source: Research Square preprint supplement (doi:10.21203/rs.3.rs-6838264/v1), 2025-06-18
Supplement: Supplementary file 1 [file 3c6d980888f97fe222efe8bb.pdf]

Supplementary Information for

## **Artificial Synapse with Tunable Dynamic Range for Neuromorphic Computing with Ion Intercalated Bilayer Graphene**

Yuzhi He<sup>1,\*</sup>, Purun (Simon) Cao<sup>2</sup>, Shahin Hashemkhani<sup>1</sup>, Yihan Liu<sup>1</sup>, Daniel Vaz<sup>1</sup>, Keya Joy<sup>2</sup>, Nathan Youngblood<sup>1</sup>, Rajkumar Kubendran<sup>1</sup>, M.P. Anantram<sup>2</sup>, Feng Xiong<sup>1,\*</sup>

<sup>1</sup>Department of Electrical and Computer Engineering (ECE), University of Pittsburgh, Pittsburgh, PA 15213, United States

<sup>2</sup>Department of Electrical and Computer Engineering (ECE), University of Washington, Seattle, WA 98195, United States

\*E-mail: [f.xiong@pitt.edu](mailto:f.xiong@pitt.edu) (F.X.)

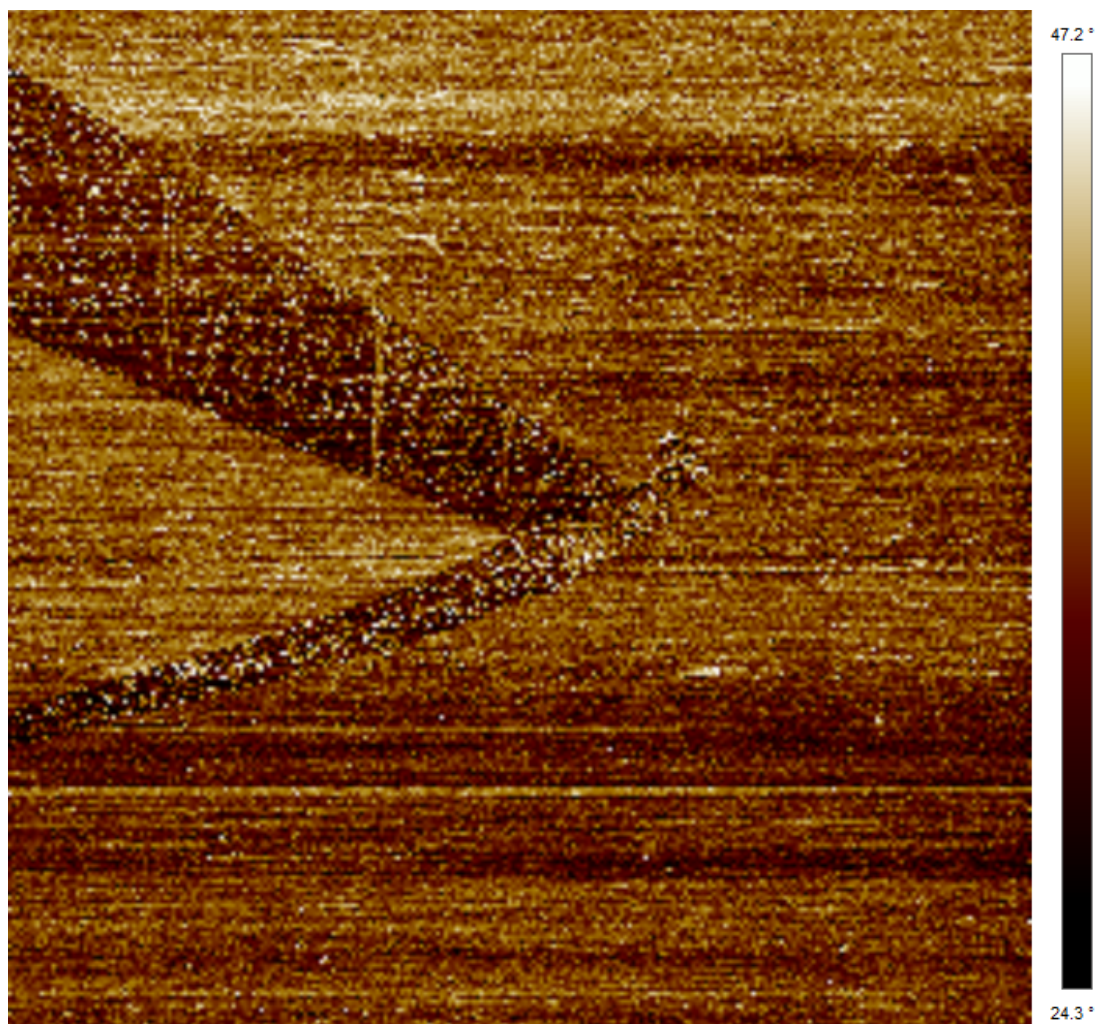

**Figure S1. AFM phase image corresponding to Figure 1c, showing the surface morphology of the bilayer graphene device.**

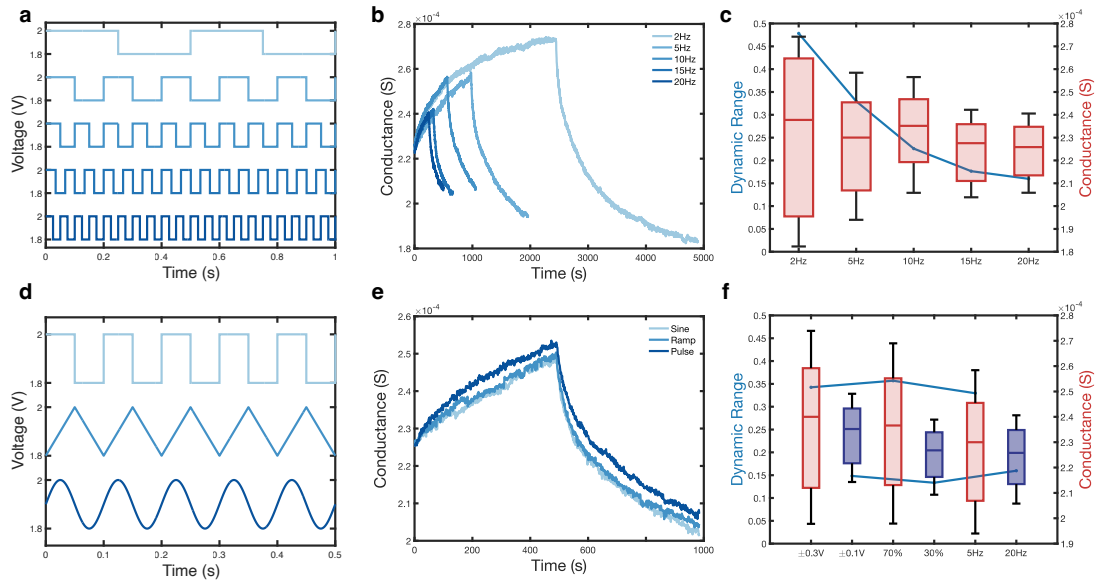

**Figure S2. a) pulses of different frequency, ranging from 2 Hz to 20 Hz; d) pulses of different waveform. Bilayer graphene ECRAM's conductance change when input pulses are b) pulses of different frequency; e) pulses of different waveform. Bilayer graphene ECRAM's dynamic range when input pulses are c) pulses of different frequency; f) pulses of different setting.**

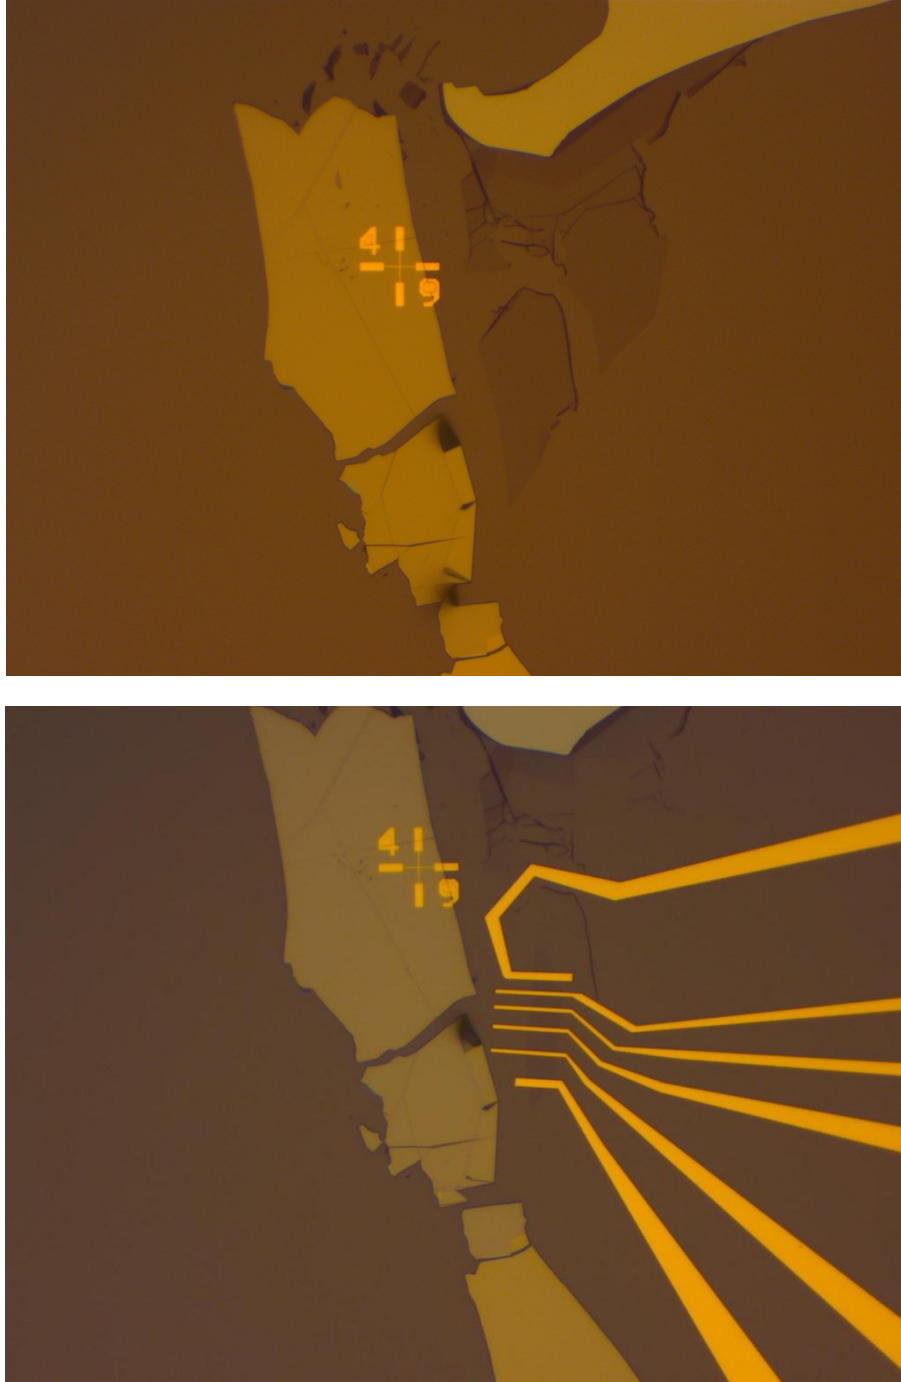

**Figure S3. Optical microscope image of the device before graphene etching and after etch for 4-terminal measurements as shown in Figure 4b. The outermost two electrodes are used for applying a small current, while the inner electrodes are used for voltage sweeping and measurement<sup>1</sup>.**

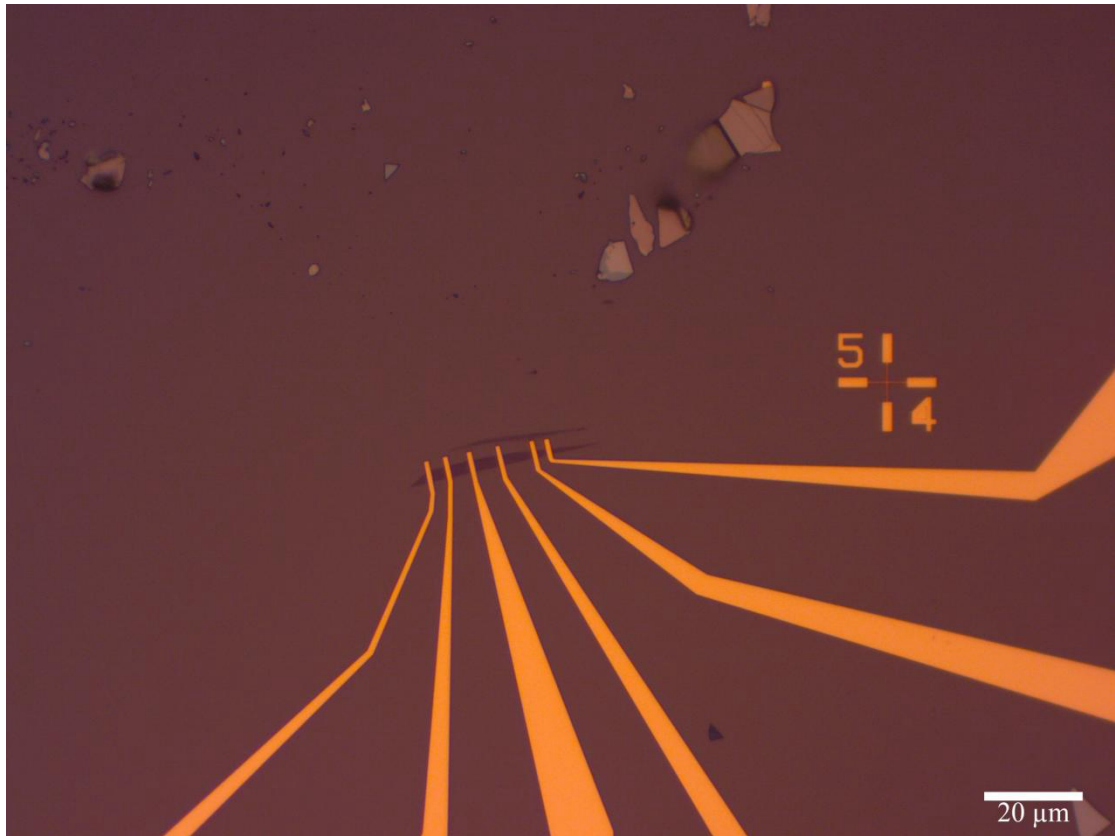

**Figure S4. Optical image of the multilayer graphene device.**

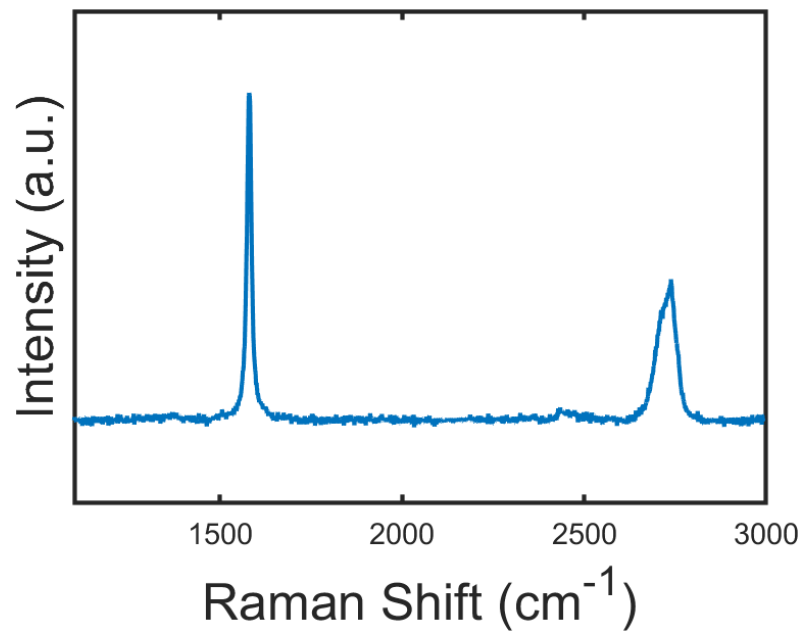

**Figure S5. Raman spectrum showing the G peak being more intense than the 2D peak, indicating the presence of multilayer graphene<sup>2,3</sup>. 6/6/25 10:58:00 AM**



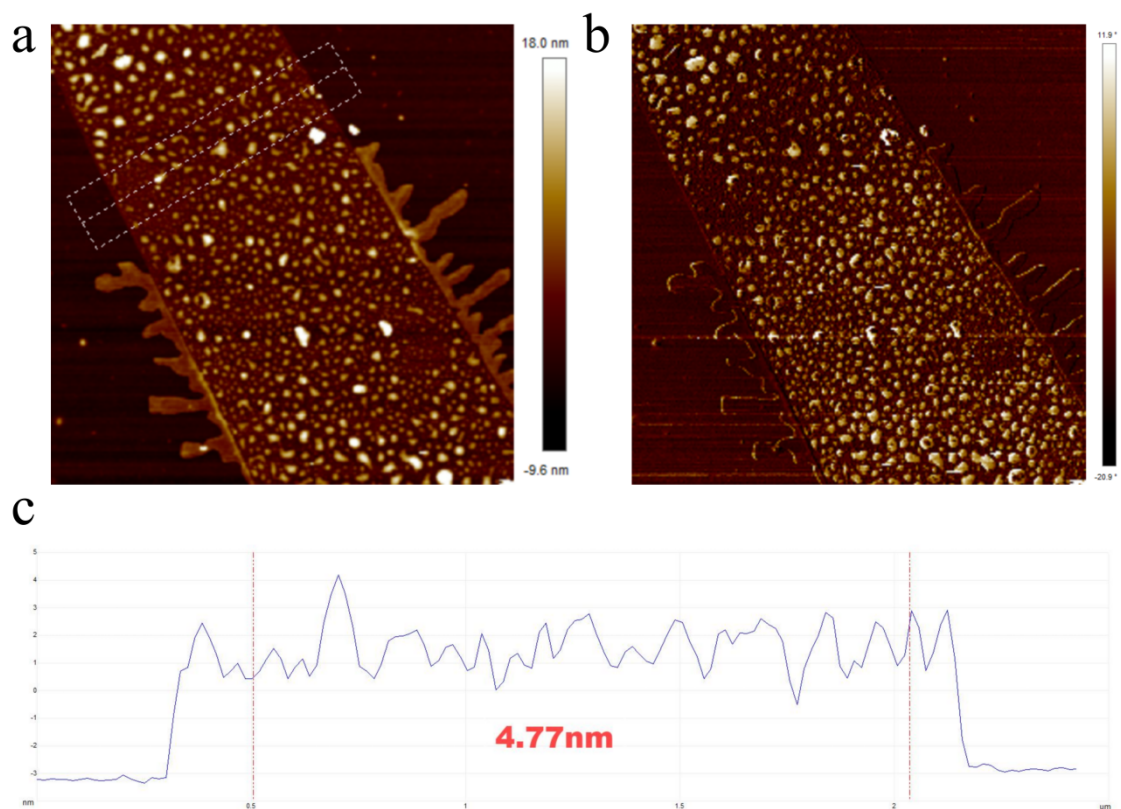

**Figure S6. (a) Atomic force microscopy (AFM) height image of the graphene device after the experiment, with the dashed box indicating the measured step range. The LiClO<sub>4</sub>/PEO layer was removed using acetone. (b) AFM phase image. (c) Thickness profile showing a measured height of 4.77 nm, confirming the multilayer graphene structure.**

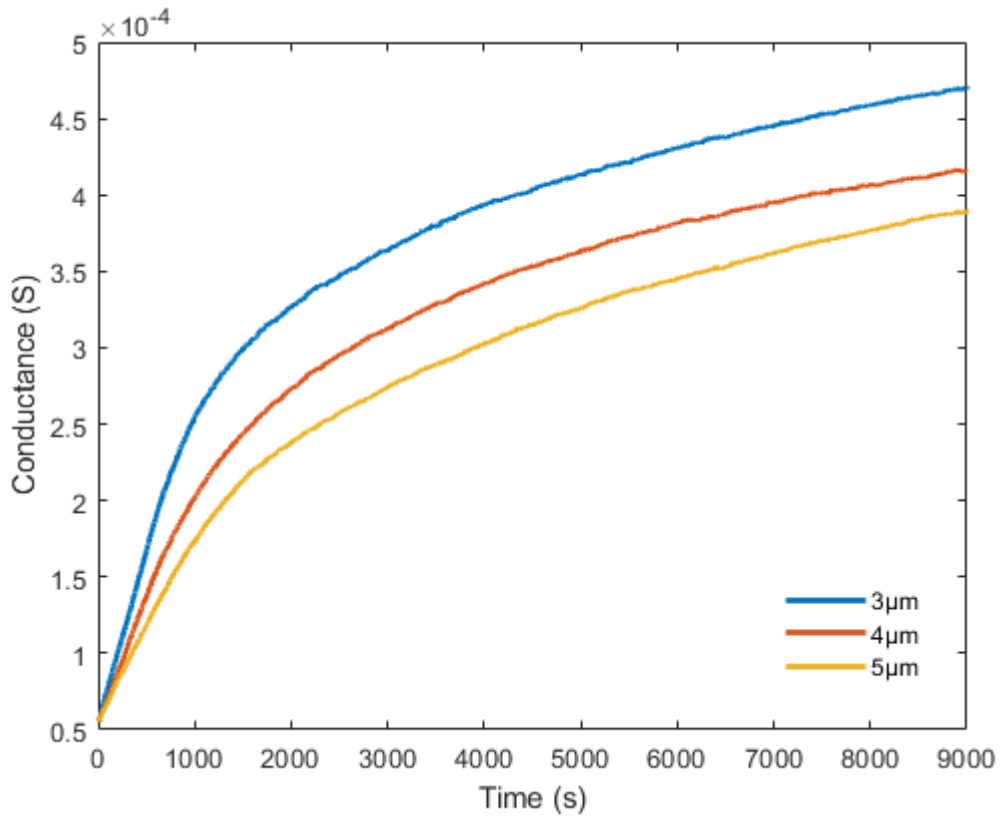

**Figure S7. Conductance versus time during the intercalation process of multilayer graphene for different channel lengths (3  $\mu\text{m}$ , 4  $\mu\text{m}$ , and 5  $\mu\text{m}$ ) as shown in Figure 4c.**

As shown in Figure S7, the bilayer graphene device exhibits a maximum conductance of 480  $\mu\text{S}$  and a minimum conductance of 55  $\mu\text{S}$ , resulting in a dynamic range of 7.7. All conductance states within this range are stable, owing to the reversible and electrochemically robust lithium-ion intercalation into the bilayer structure. This intercalation process induces continuous modulation of carrier concentration without compromising the structural integrity of graphene, thereby ensuring non-volatile and reliable conductance states. The absence of drift or degradation over time highlights the intrinsic material stability and supports its applicability in neuromorphic architectures requiring high precision and endurance<sup>4</sup>.

## References

1. Bobadilla, A. D., Ocola, L. E., Sumant, A. V., Kaminski, M. & Seminario, J. M. PMMA-Assisted Plasma Patterning of Graphene. *Journal of Nanotechnology* **2018**, 1–8 (2018).
2. Shen, Z., Li, J., Yi, M., Zhang, X. & Ma, S. Preparation of graphene by jet cavitation. *Nanotechnology* **22**, 365306 (2011).
3. Hao, Y. *et al.* Probing Layer Number and Stacking Order of Few-Layer Graphene by Raman Spectroscopy. *Small* **6**, 195–200 (2010).
4. Sharbati, M. T. *et al.* Low-Power, Electrochemically Tunable Graphene Synapses for Neuromorphic Computing. *Advanced Materials* **30**, 1802353 (2018).
